# Supplementary material
Source: PubMed Central journal article supplement (PMC4105059)
Supplement: ja502482a_si_001.pdf [file ja502482a_si_001.pdf]

## **-Supporting Information-**

### **Photoactivatable Glycopolymers for the Proteome-Wide Identification of Fucose- $\alpha$ (1-2)-Galactose Binding Proteins**

Arif Wibowo,<sup>†</sup> Eric C. Peters,<sup>§</sup> and Linda C. Hsieh-Wilson<sup>†</sup>

<sup>†</sup>Division of Chemistry and Chemical Engineering, California Institute of Technology and Howard Hughes Medical Institute, 1200 East California Boulevard, Pasadena, California 91125, United States

<sup>§</sup>Genomics Institute of the Novartis Research Foundation, San Diego, California 92121, United States

#### **CONTENTS:**

1. Supporting Schemes
2. Supporting Figure
3. Supporting Table
4. Experimental Methods
  - 4-1. Materials and Methods
  - 4-2. Synthetic Procedures
  - 4-3. Biological Procedures
  - 4-4. Representative <sup>1</sup>H and <sup>13</sup>C NMR Spectra
5. References

## 1. Supporting Schemes

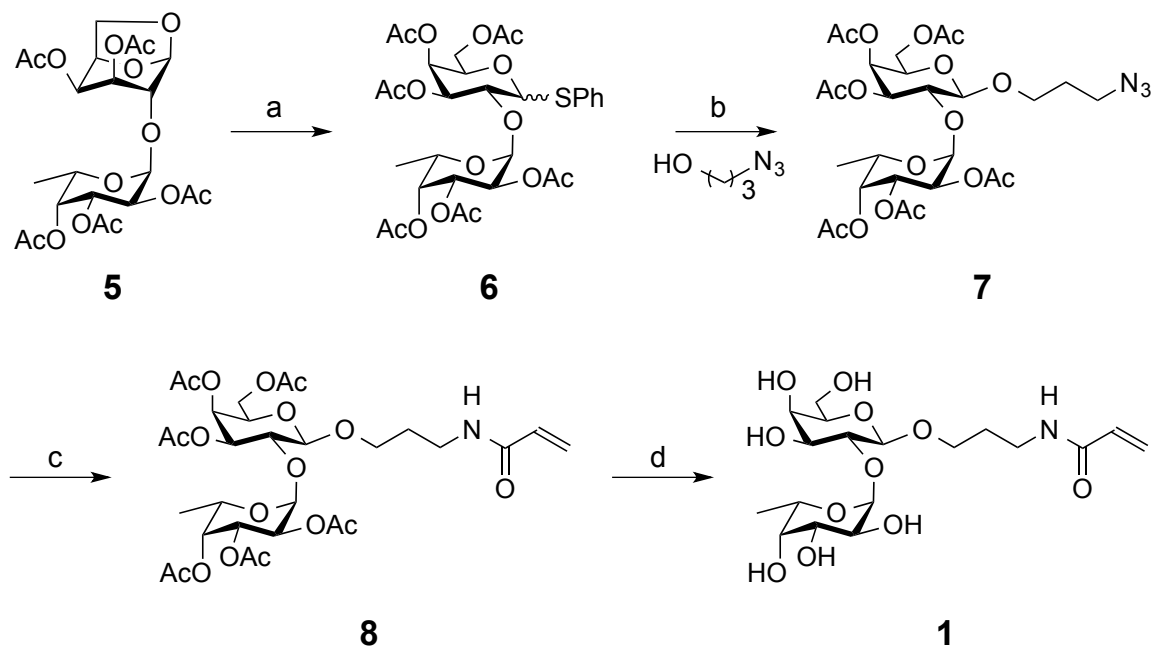

**Scheme S1.** a) (i) TMSSPh, ZnI<sub>2</sub>, DCM; (ii) TBAF, THF; (iii) Ac<sub>2</sub>O, DMAP, pyr (55%, three steps). b) NIS-AgOTf, 3-azido-1-propanol, MeCN, -20 °C to 25 °C, 64%. c) (i) Pd/C, H<sub>2</sub>, EtOAc; (ii) aq. NaHCO<sub>3</sub>, acryloyl chloride, dioxane, 0 °C to 25 °C (57%, two steps). d) NaOMe, MeOH, 90%.

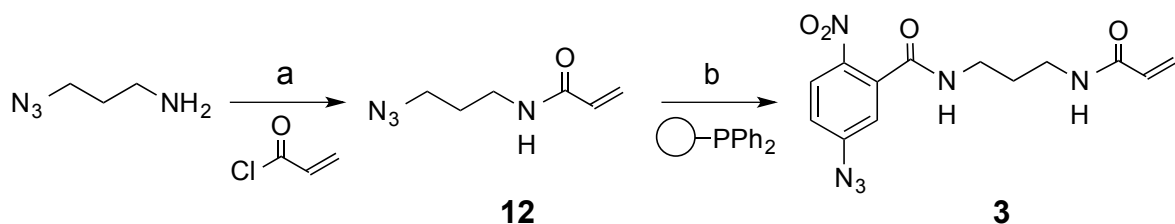

**Scheme S2.** (a) aq. NaHCO<sub>3</sub>, acryloyl chloride, dioxane, 0 °C to 25 °C, 83%. (b) (i) PPh<sub>3</sub> polystyrene beads, THF, 37 °C, 24 h; (ii) 10:1 THF: H<sub>2</sub>O, 37 °C, 48 h; (iii) ANB-NOS, Et<sub>3</sub>N, DMF (33%, three steps).

## 2. Supporting Figure

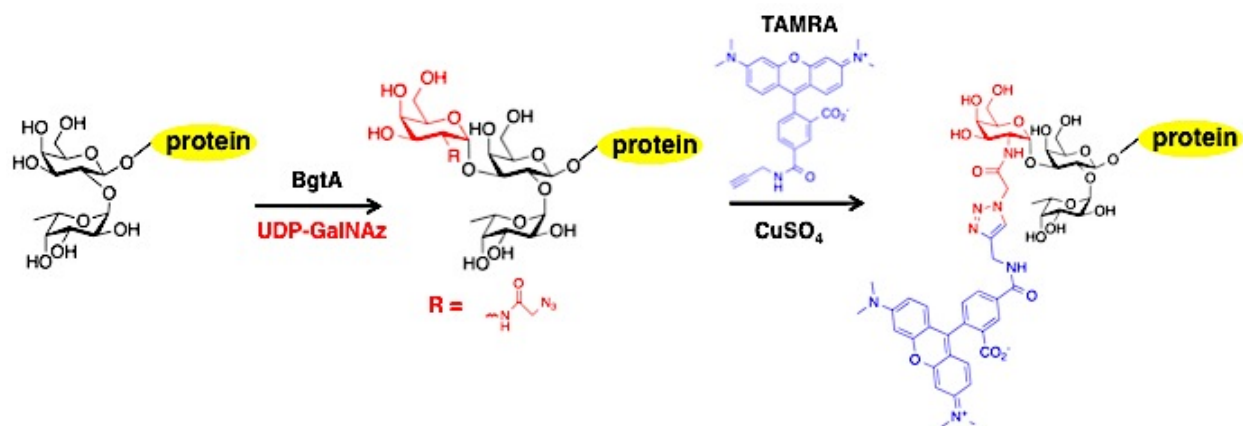

**Figure S1.** Chemoenzymatic strategy for the detection of Fuc $\alpha$ (1-2)Gal glycans. Exogenous addition of the glycosyltransferase BgtA and UDP-GalNAz will covalently tag Fuc $\alpha$ (1-2)Gal sugars with an azido functionality, which can be labeled with reporter groups such as fluorescent dyes using azide-alkyne [3+2] cycloaddition chemistry.

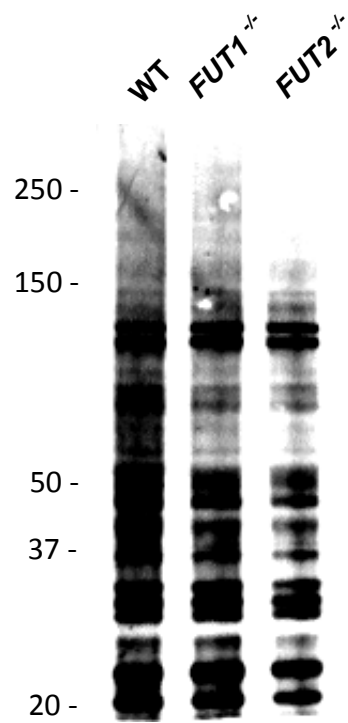

**Figure S2.** Expression of Fuc $\alpha$ (1-2)Gal-containing glycoproteins in the rat brain cortex. Glycoproteins were detected using fluorescein-conjugated UEA1.

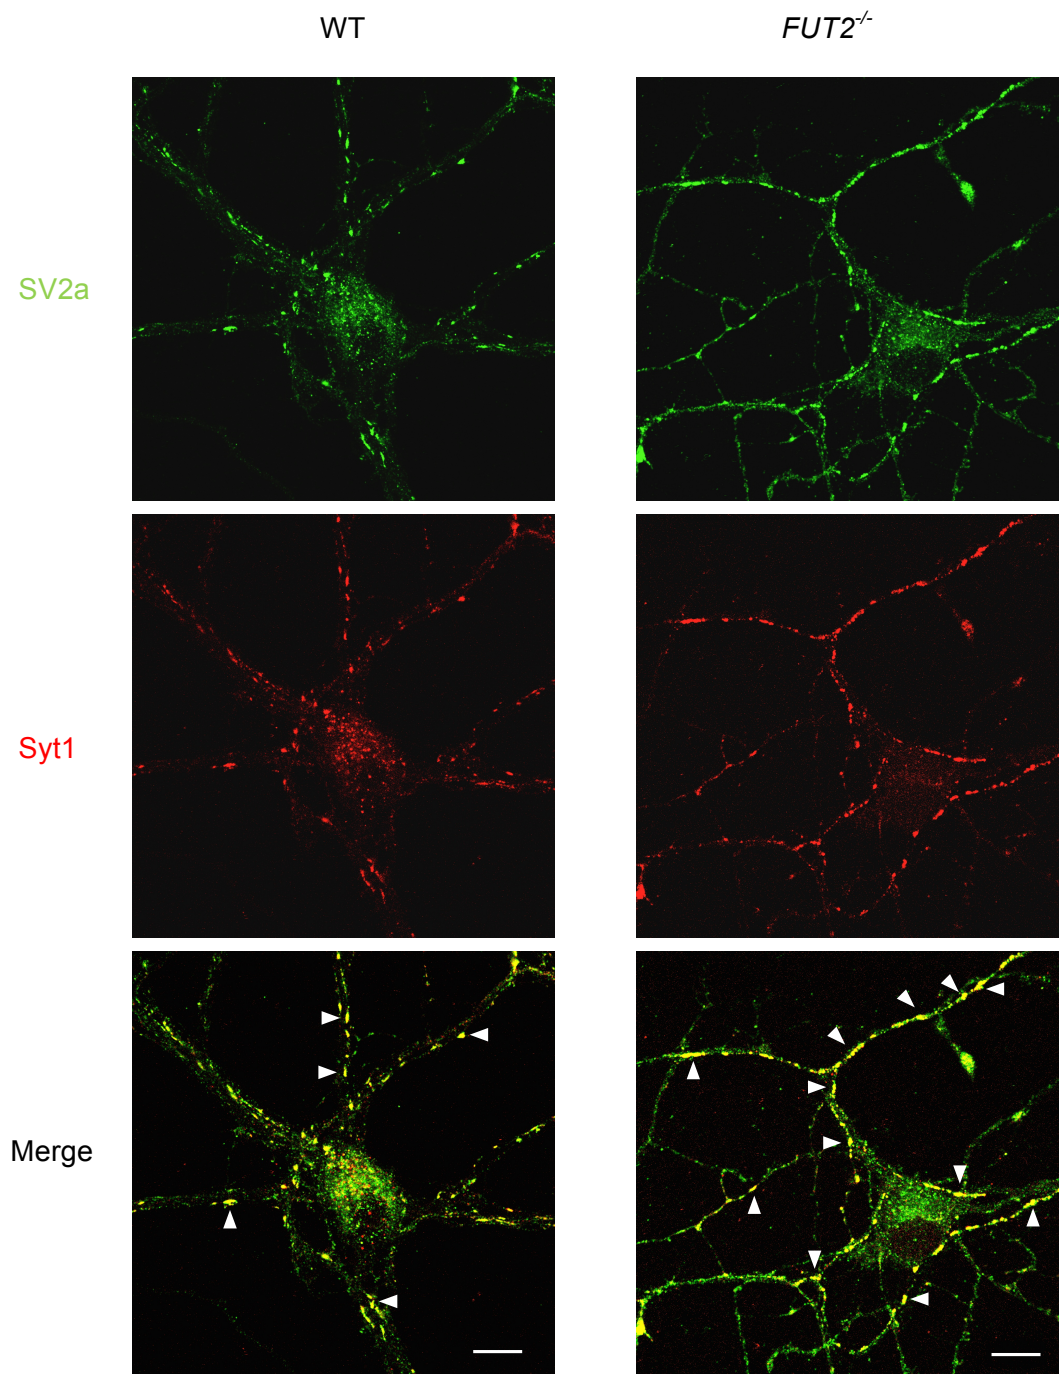

**Figure S3.** Coimmunostaining of WT and *FUT2<sup>-/-</sup>* cortical neuronal cultures for SV2a (green) and syt1 (red). Arrowheads indicate colocalized puncta (yellow) of SV2a and syt along the neuronal processes. Scale bar = 10  $\mu$ m.

A)

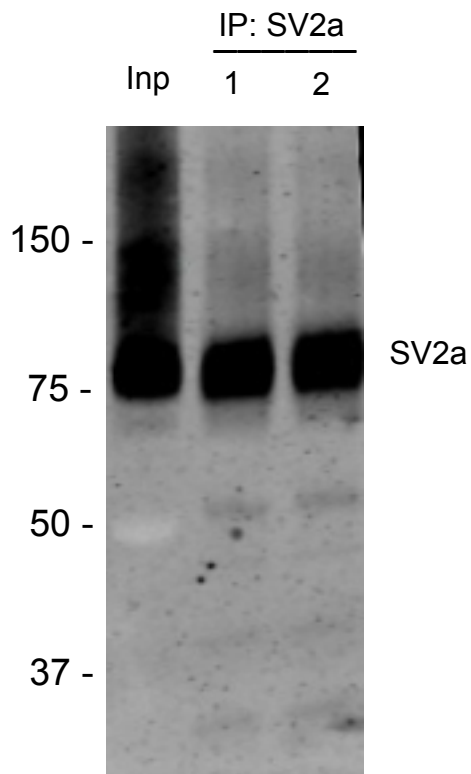

B)

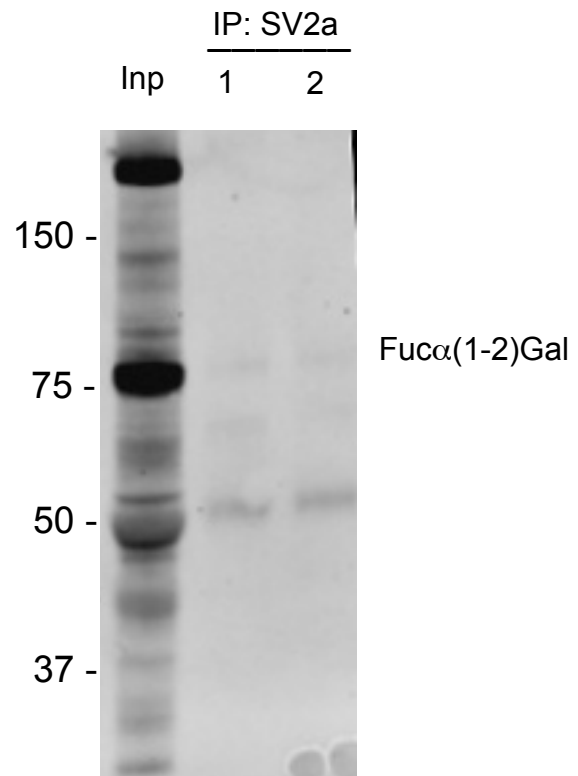

**Figure S4.** SV2a is not modified by Fuc $\alpha$ (1-2)Gal glycans . SV2a was immunoprecipitated from the rat brain cortex, and the immunoprecipitated protein was analyzed by A) Western blotting using an anti-Sv2a antibody or B) lectin blotting using biotinylated-UEAI followed by streptavidin conjugated to horseradish peroxidase to detect Fuc $\alpha$ (1-2)Gal glycans. Inp, lysate input into IP; 1 and 2 indicate duplicate samples.

### 3. Supporting Table

**Table S1.** Fuc $\alpha$ (1-2)Gal Glycan-Binding Proteins Identified from Rat Synaptosomal and Membrane Fractions<sup>a</sup>

| Protein                                 | Accession Number | Unique Peptides <sup>b</sup> | % Coverage <sup>b</sup> | MW (Da) | Function                            |
|-----------------------------------------|------------------|------------------------------|-------------------------|---------|-------------------------------------|
| <b>Cellular Adhesion</b>                |                  |                              |                         |         |                                     |
| Ctnna2                                  | IPI00364916.2    | 8                            | 13.6                    | 100000  | Cellular differentiation            |
| Ctnnd1                                  | IPI00359491.3    | 6                            | 10                      | 105000  | Cellular recognition                |
| <b>Cellular Signalling</b>              |                  |                              |                         |         |                                     |
| Dclk1 (Ania 4)                          | IPI00778626.1    | 13                           | 23.8                    | 84000   | Neuronal migration                  |
| Centg3                                  | IPI00358128.3    | 6                            | 9                       | 102000  | Signal transduction                 |
| Crmp1                                   | IPI00561065.2    | 9                            | 16                      | 74000   | Axonal guidance                     |
| Crimp4                                  | IPI00203250.1    | 7                            | 13.6                    | 74000   | Neurite outgrowth                   |
| G $\alpha$ o                            | IPI00231505.5    | 7                            | 22.3                    | 40000   | Signal transduction                 |
| Gnaq                                    | IPI00230868.4    | 6                            | 20.1                    | 42000   | Signal transduction                 |
| Pkc $\epsilon$                          | IPI00551781.4    | 10                           | 17.8                    | 83000   | Phosphorylation                     |
| <b>Cytoskeletal-Associated Proteins</b> |                  |                              |                         |         |                                     |
| Ckap5                                   | IPI00764313.1    | 9                            | 5.9                     | 197000  | Microtubule elongation              |
| Cyln2                                   | IPI00195929.1    | 10                           | 12.3                    | 111000  | Microtubule associated transport    |
| Dync1h1                                 | IPI00327630.1    | 54                           | 13.5                    | 532000  | Dynein motor protein                |
| Kif5b                                   | IPI00364904.2    | 10                           | 15.1                    | 110000  | Kinesin motor protein               |
| Kif5c                                   | IPI00193402.4    | 16                           | 21.2                    | 109000  | Kinesin motor protein               |
| LOC362587 similar to Macf1              | IPI00359003.4    | 6                            | 1                       | 831000  | Actin regulation                    |
| LOC367171 similar to Map4               | IPI00393975.2    | 8                            | 10.4                    | 110000  | Microtubule assembly                |
| LOC363309 similar to Tbcd               | IPI00765967.1    | 6                            | 5.6                     | 134000  | Microtubule regulation              |
| Map2                                    | IPI00206171.1    | 10                           | 7.1                     | 202000  | Cytoskeletal organization           |
| <b>Cellular Metabolism</b>              |                  |                              |                         |         |                                     |
| Aco2                                    | IPI00421539.3    | 8                            | 13.1                    | 85000   | Mitochondrial metabolism            |
| Cad                                     | IPI00365582.3    | 6                            | 3.1                     | 243000  | Enzymatic biosynthesis              |
| Fasn                                    | IPI00200661.1    | 21                           | 11.1                    | 273000  | Lipid biosynthesis                  |
| Hk1                                     | IPI00202543.1    | 10                           | 13                      | 102000  | Mitochondrial metabolism            |
| Imm1                                    | IPI00364895.4    | 7                            | 12.4                    | 82000   | Mitochondrial homeostasis           |
| LOC360975 similar to Odo1               | IPI00215093.1    | 13                           | 17.9                    | 116000  | Mitochondrial metabolism            |
| Phgdh                                   | IPI00475835.3    | 7                            | 16.9                    | 56000   | Enzymatic biosynthesis              |
| Prss15                                  | IPI00205076.1    | 10                           | 12.9                    | 106000  | Mitochondrial proteases             |
| Uspx9                                   | IPI00204923.4    | 11                           | 5.4                     | 291000  | Ubiquitin Hydrolases                |
| <b>Protein Synthesis</b>                |                  |                              |                         |         |                                     |
| Aars                                    | IPI00363563.3    | 8                            | 11.5                    | 107000  | Translation                         |
| Cand1                                   | IPI00205466.1    | 8                            | 7.1                     | 136000  | Transcription                       |
| Ddx1                                    | IPI00555314.1    | 8                            | 12.8                    | 82000   | Transcription                       |
| Lrp1rc Leucine rich protein 157         | IPI00360075.2    | 12                           | 10.7                    | 157000  | Transcription                       |
| Nars                                    | IPI00565217.3    | 7                            | 15.2                    | 64000   | Translation                         |
| Tufm                                    | IPI00371236.3    | 7                            | 19.7                    | 50000   | Translation                         |
| <b>Protein Trafficking</b>              |                  |                              |                         |         |                                     |
| Dctn1                                   | IPI00196703.1    | 8                            | 7.2                     | 142000  | Retrograde vesicle transport        |
| Hspcb                                   | IPI00471584.7    | 13                           | 18.9                    | 83000   | Chaperone for protein folding       |
| Hspd1                                   | IPI00339148.2    | 12                           | 33                      | 61000   | Chaperone for mitochondrial protein |
| LOC315676 similar to Dmx-like 2         | IPI00369671.3    | 7                            | 3.1                     | 344000  | Synaptic vesicle scaffolding        |
| Sv2a                                    | IPI00208115.4    | 6                            | 10.8                    | 83000   | Neurotransmitter release            |
| Syn2                                    | IPI00210036.1    | 6                            | 17.1                    | 63000   | Neurotransmitter release            |
| Vac14                                   | IPI00230981.1    | 7                            | 11.6                    | 88000   | Endosome regulation                 |
| Vps35                                   | IPI00363493.2    | 6                            | 9.6                     | 92000   | Retrograde protein transport        |
| <b>Transporters</b>                     |                  |                              |                         |         |                                     |
| Atp5a1                                  | IPI00396910.1    | 10                           | 24.6                    | 60000   | ADP/ATP biosynthesis                |
| Gria2                                   | IPI00780113.1    | 6                            | 7.5                     | 103000  | Glutamate Receptor                  |
| Slc25a4                                 | IPI00231927.11   | 8                            | 29.9                    | 33000   | ADP/ATP Translocase                 |

<sup>a</sup> Proteins from Sprague Dawley rats were captured using glycopolymer **10**

<sup>b</sup> The number of full tryptic unique peptides and their coverage were identified from a reversed database searching strategy. See Materials and Methods for procedures and analysis criteria.

## 4. Experimental Methods

### 4-1. Material and Methods

Unless otherwise stated, reactions were performed in flame-dried glassware under an argon atmosphere, using anhydrous solvents. Solvents were dried by passage through an activated alumina column under argon. All other commercially obtained reagents were used as received unless otherwise noted. Thin layer chromatography (TLC) was performed using E. Merck silica gel 60 F254 precoated plates (0.25 mm). Visualization of the developed chromatogram was performed by UV, *p*-anisaldehyde or ninhydrin stain as necessary. ICN silica gel (particle size 0.032 - 0.063 mm) was used for flash chromatography. Gel filtration chromatography (Sephadex LH-20, and G-25 ultrafine) was used in order to achieve purification of the final products. <sup>1</sup>H NMR spectra were recorded on Varian Inova 500 (500 MHz) and 600 (600 MHz) spectrometers and are reported in parts per million ( $\delta$ ) relative to CDCl<sub>3</sub> (7.26 ppm), CD<sub>3</sub>OD (4.87 ppm) or D<sub>2</sub>O (4.80 ppm). Data for <sup>1</sup>H are reported as follows: chemical shift ( $\delta$  ppm), multiplicity (s = singlet, d = doublet, t = triplet, q = quartet, m = multiplet), coupling constant in Hz, and integration. <sup>13</sup>C NMR spectra were recorded on a Varian Inova 500 (125 MHz) spectrometer and are reported in terms of chemical shift. High-resolution mass spectra were obtained by the Caltech Mass Spectral Facility using a Waters LCT Premier XE high-resolution mass spectrometer.

Gel Permeation Chromatography (GPC) was carried out in 100 mM NaNO<sub>3</sub> and 200 ppm NaN<sub>3</sub> in water using an OHpak SB – 804 HQ column (Shodex), which was connected in series with a miniDAWN TREOS MALLS detector and Optilab rEX differential refractometer (both from Wyatt Technology). The dn/dc values were obtained for each injection assuming 100% mass elution from the column using dextran (40K) as a calibration standard to confirm complete mass recovery.



## 4-2. Synthetic Procedures

**Phenyl 3,4,6-tri-O-acetyl-2-O-(methyl 2,3,4-tri-O-acetyl- $\alpha$ -L-fucopyranosyl)-1-thio-D-galactopyranoside (6).** A mixture of **5**<sup>1</sup> (510 mg, 0.98 mmol), (phenylthio)trimethylsilane (0.77 mL, 3.9 mmol) and zinc iodide (1.3 g, 3.9 mmol) in CH<sub>2</sub>Cl<sub>2</sub> (1.0 mL) was stirred overnight at rt.<sup>2</sup> Following complete consumption of the starting material, the mixture was diluted with EtOAc and washed successfully with aq. NaHCO<sub>3</sub>, H<sub>2</sub>O and brine. The organic extract was dried over Na<sub>2</sub>SO<sub>4</sub> and concentrated *in vacuo*. The resulting residue was dissolved in dry THF (2.8 mL), and tetrabutylammonium fluoride in THF (2.0 mL of a 1M solution) was added to the solution. After 1 h, the solvent was removed *in vacuo*, and the residue was redissolved in EtOAc, washed with H<sub>2</sub>O, aq. NaHCO<sub>3</sub>, and brine. The organic layer was dried over Na<sub>2</sub>SO<sub>4</sub> and concentrated to afford the crude thioglycoside. To a solution of this thioglycoside in dry pyridine (9.6 mL, 120 mmol) was added a catalytic amount of DMAP (150 mg, 1.2 mmol) and acetic anhydride (6.1 mL, 64 mmol). The reaction mixture was stirred at rt overnight, then diluted with EtOAc and washed successively with aq. CuSO<sub>4</sub>, aq. NaHCO<sub>3</sub>, H<sub>2</sub>O and brine. The organic extract was dried over Na<sub>2</sub>SO<sub>4</sub> and concentrated *in vacuo*. Purification by silica gel flash chromatography (3:2 Hex:EtOAc) afforded **7** (360 mg, 55%) as a white solid. <sup>1</sup>H NMR (500 MHz, CDCl<sub>3</sub>):  $\delta$  7.48 (d, *J* = 7.3 Hz, 2H), 7.36 – 7.27 (m, 3H), 5.69 (d, *J* = 5.7 Hz, 1H), 5.45 (d, *J* = 3.1 Hz, 1H), 5.34 (d, *J* = 3.2 Hz, 1H), 5.30 (d, *J* = 3.7 Hz, 2H), 5.21 (dd, *J* = 10.6, 3.4 Hz, 1H), 5.03 (dd, *J* = 10.7, 3.9 Hz, 1H), 4.73 (t, *J* = 6.5 Hz, 1H), 4.36 (q, *J* = 6.5 Hz, 1H), 4.29 (dd, *J* = 10.6, 5.7 Hz, 1H), 4.07 (t, *J* = 6.4 Hz, 2H), 2.15 (s, 3H), 2.14 (s, 3H), 2.04 (s, 3H), 1.99 (s, 6H), 1.96 (s, 3H), 1.00 (d, *J* = 6.5 Hz, 3H). <sup>13</sup>C NMR (125 MHz, CDCl<sub>3</sub>):  $\delta$  170.69, 170.65, 170.56, 170.27, 170.03, 169.97, 133.22, 131.70 (2C), 129.32 (2C), 127.78, 98.21, 87.81, 73.15, 70.99, 70.09, 68.16 (2C), 67.89, 67.35, 65.87, 61.83, 20.92, 20.88, 20.84 (2C), 20.81, 20.80, 16.03. HRMS *m/z* Calculated for C<sub>30</sub>H<sub>38</sub>O<sub>15</sub>S [M]<sup>+</sup>: 670.1931. Found: 670.1941.

**3-Azidopropyl-3,4,6-tri-O-acetyl-2-O-(methyl 2,3,4-tri-O-acetyl- $\alpha$ -L-fucopyranosyl)-D-galactopyranoside (7).** The following modified procedure was adapted from Kanie *et al.*<sup>3</sup> Compound **6** (360 mg, 0.54 mmol) and 3-azido-1-propanol (75  $\mu$ L, 0.81 mmol) was azeotroped with toluene, dissolved in acetonitrile with 4Å molecular sieves, and cooled to -20 °C. *N*-Iodosuccinimide (190 mg, 0.81 mmol) was added, and the mixture was allowed to stir for 15 min. Silver triflate (210 mg, 0.81 mmol) was then added, and the mixture was allowed to warm to rt and stirred for 1 h. After the reaction was complete, the reaction mixture was diluted with EtOAc and washed successively with saturated aq. Na<sub>2</sub>SO<sub>3</sub>, aq. NaHCO<sub>3</sub>, and brine. The organic extract was dried over MgSO<sub>4</sub> and concentrated *in vacuo*. The crude product was purified by silica gel flash chromatography (3:2 Hex:EtOAc) to afford **7** (230 mg, 64%) as a pale-yellow solid. <sup>1</sup>H NMR (500 MHz, CDCl<sub>3</sub>):  $\delta$  5.39 (d, *J* = 3.9 Hz, 1H), 5.35 – 5.25 (m, 3H), 5.05 – 4.98 (m, 2H), 4.54 – 4.44 (m, 2H), 4.18 (dd, *J* = 11.2, 6.5 Hz, 1H), 4.10 (dd, *J* = 11.3, 6.9 Hz, 1H), 4.01 – 3.85 (m, 3H), 3.68 (dt, *J* = 9.9, 6.3 Hz, 1H), 3.43 (t, *J* = 6.6 Hz, 2H), 2.16 (s, 3H), 2.13 (s, 3H), 2.05 (s, 3H), 2.01 (s, 3H), 1.99 (d, *J* = 3.4 Hz, 6H), 1.93 – 1.86 (m, 2H), 1.13 (d, *J* = 6.5 Hz, 3H). <sup>13</sup>C NMR (125 MHz, CDCl<sub>3</sub>):  $\delta$  170.78, 170.73, 170.54, 170.41 (2C), 170.20, 101.75, 95.85, 73.83, 71.91, 71.25, 70.63, 68.33, 67.73, 67.31, 67.02, 64.77, 61.38, 48.28, 29.44, 20.88, 20.84 (3C), 20.80, 20.77, 15.90. HRMS *m/z* Calculated for C<sub>27</sub>H<sub>39</sub>O<sub>16</sub>Na [M+Na]<sup>+</sup>: 684.2228. Found: 684.2228.

**3-N-Acryloyl-aminopropyl-3,4,6-tri-O-acetyl-2-O-(methyl 2,3,4-tri-O-acetyl- $\alpha$ -L-fucopyranosyl)-D-galactopyranoside (8).** A suspension of **7** (200 mg, 0.31 mmol) and Pd/C (20% by wt) in dry EtOAc (3.1 mL) was charged with H<sub>2</sub> gas for 3.5 h in the presence of a catalytic amount of triethylamine. The reaction mixture was diluted with EtOAc and filtered through celite. The filtrate was concentrated *in vacuo*, and the crude material was dissolved in dioxane (3.0 mL) before the addition of aq. NaHCO<sub>3</sub> (33 mg in 2.9 mL H<sub>2</sub>O, 0.39 mmol). The reaction mixture was cooled to 0 °C, stirred for 15 min, and acryloyl chloride (37  $\mu$ L, 0.45 mmol) was added

dropwise. The reaction was allowed to warm to rt overnight with minimal exposure to light, then diluted with EtOAc and washed with H<sub>2</sub>O. The organic layer was concentrated *in vacuo*, and the crude product was purified by silica gel flash chromatography (1:9 MeOH:CH<sub>2</sub>Cl<sub>2</sub>) to afford **8** as colorless oil (120 mg, 57%). <sup>1</sup>H NMR (500 MHz, CDCl<sub>3</sub>): δ 6.30 (dd, *J* = 17.0, 1.4 Hz, 1H), 6.14 (dd, *J* = 17.0, 10.3 Hz, 1H), 5.64 (dd, *J* = 10.3, 1.4 Hz, 1H), 5.40 (d, *J* = 3.8 Hz, 1H), 5.32 – 5.27 (m, 3H), 5.04 – 4.97 (m, 2H), 4.54 (q, *J* = 6.6 Hz, 1H), 4.47 (d, *J* = 7.8 Hz, 1H), 4.18 (dd, *J* = 11.3, 6.7 Hz, 1H), 4.11 (dd, *J* = 12.4, 6.9 Hz, 1H), 3.97 – 3.86 (m, 3H), 3.76 – 3.69 (m, 1H), 3.44 (q, *J* = 6.6 Hz, 2H), 2.16 (s, 3H), 2.14 (s, 3H), 2.05 (d, *J* = 2.1 Hz, 3H), 2.01 (s, 3H), 2.00 (s, 3H), 1.99 (s, 3H), 1.89 (td, *J* = 13.1, 6.6 Hz, 2H), 1.13 (d, *J* = 6.5 Hz, 3H). <sup>13</sup>C NMR (125 MHz, CDCl<sub>3</sub>): δ 170.71, 170.70, 170.53, 170.47, 170.32, 170.30, 165.86, 131.02, 126.35, 101.74, 95.67, 73.72, 71.62, 71.15, 70.77, 68.24, 67.98, 67.83, 67.40, 64.79, 61.44, 37.03, 29.69, 20.88, 20.81, 20.78 (2C), 20.73 (2C), 15.83. HRMS *m/z* Calculated for C<sub>30</sub>H<sub>44</sub>NO<sub>17</sub> [M+H]<sup>+</sup>: 690.2609. Found: 690.2629.

### **3-*N*-Acryloyl-aminopropyl-2-*O*-(α-*L*-fucopyranosyl)-*D*-galactopyranoside (1).**

To a solution of **8** (120 mg, 0.17 mmol) in MeOH (1.1 mL) was added 0.5 M NaOMe (100 μL, 0.052 mmol). The reaction mixture was stirred at rt for 1 h, then neutralized to pH ~7 by the addition of Dowex 50W-X4-200 (H<sup>+</sup>), and the resin was filtered off. The filtrate was concentrated *in vacuo* and purified with gel filtration chromatography (Sephadex LH-20) to obtain disaccharide monomer **1** as a white foam (68 mg, 90%). <sup>1</sup>H NMR (500 MHz, D<sub>2</sub>O): δ 6.25 (dd, *J* = 17.1, 10.2 Hz, 1H), 6.17 (dd, *J* = 17.1, 1.3 Hz, 1H), 5.74 (dd, *J* = 10.2, 1.3 Hz, 1H), 5.23 (d, *J* = 3.9 Hz, 1H), 4.48 (d, *J* = 7.9 Hz, 1H), 4.29 (q, *J* = 6.5 Hz, 1H), 3.95 (dt, *J* = 10.2, 6.8 Hz, 1H), 3.89 (d, *J* = 3.3 Hz, 1H), 3.84 (dt, *J* = 9.5, 2.7 Hz, 2H), 3.81 – 3.71 (m, 5H), 3.67 (dd, *J* = 7.7, 4.5 Hz, 1H), 3.58 (dd, *J* = 9.5, 7.9 Hz, 1H), 3.35 (dd, *J* = 11.3, 6.7 Hz, 2H), 1.91 – 1.84 (m, 2H), 1.19 (d, *J* = 6.6 Hz, 3H). <sup>13</sup>C NMR (125 MHz, D<sub>2</sub>O): δ 168.68, 130.08, 127.30, 101.68, 99.67, 77.09,

75.14, 73.83, 72.01, 69.64, 69.09, 68.48, 67.87, 66.98, 61.12, 36.57, 28.70, 15.51. HRMS  $m/z$  Calculated for  $C_{18}H_{31}NO_{11}Na$   $[M+Na]^+$ : 460.1795. Found: 460.1781.

**3-*N*-Acryloyl-aminopropyl azide (12).** To a solution of 3-azidopropylamine (870 mg, 8.7 mmol) in dioxane (20 mL) was added aq.  $NHCO_3$  (950 mg in 12 mL  $H_2O$ , 11 mmol). The reaction mixture was cooled to 0 °C and stirred for 15 min. Acryloyl chloride (1.1 mL, 13 mmol) was then added dropwise, and the reaction mixture was warmed to rt while minimizing exposure to light. After 2 h, the mixture was diluted with EtOAc, washed with  $H_2O$ , and the organic layer was concentrated *in vacuo*. The crude product was purified by silica gel flash chromatography (1:1 Hex:EtOAc) to afford **12** as a colorless oil (1.1 g, 83%).  $^1H$  NMR (500 MHz,  $CDCl_3$ ):  $\delta$  6.29 (dd,  $J = 17.0, 1.3$  Hz, 1H), 6.08 (dd,  $J = 17.0, 10.3$  Hz, 1H), 5.66 (dd,  $J = 10.3, 1.3$  Hz, 1H), 3.44 (dd,  $J = 13.0, 6.5$  Hz, 2H), 3.40 (t,  $J = 6.6$  Hz, 2H), 1.88 – 1.80 (m, 2H).  $^{13}C$  NMR (125 MHz,  $CDCl_3$ ):  $\delta$  165.84, 130.77, 126.80, 49.52, 37.36, 28.87. HRMS  $m/z$  Calculated for  $C_6H_{10}N_4O$   $[M]^+$ : 154.0855. Found: 154.0842.

**3-*N*-Acryloyl-aminopropyl-2-nitrophenylazide (3).** The following procedure was modified from Lindsley *et al.* and Hemming *et al.*<sup>4</sup> Triphenylphosphine polystyrene resin (Novabiochem) was first equilibrated by washing successively with THF,  $CH_2Cl_2$  and MeOH. After drying *in vacuo*, a suspension of the resin (3.4 g, 3.4 mmol) and **12** (530 mg, 3.4 mmol) in THF (21 mL) was gently shaken at 37 °C for 24 h. The mixture was filtered, and the residual beads were washed successively with THF,  $CH_2Cl_2$  and MeOH. After drying *in vacuo*, the resin was resuspended in 10:1 THF/ $H_2O$  (15 mL) and gently shaken at 37 °C for 48 h. The filtrate was collected, and the resin was washed with  $CH_2Cl_2$  and MeOH. The filtrate and the washes were combined and concentrated *in vacuo* to afford the amine intermediate (190 mg, 43%). To a solution of the amine in dry DMF (7.5 mL) was added  $Et_3N$  (0.11 mL, 0.79 mmol) and *N*-(5-azido-2-nitrobenzyloxy)-succinimide (ANB-NOS, Pierce; 200 mg, 0.55 mmol). The reaction was

allowed to stir overnight in the dark, concentrated *in vacuo*, and the crude product was purified by silica gel flash chromatography (10:1 EtOAc:MeOH) to afford nitrophenylazide monomer **3** as a pale yellow solid (69 mg, 33 %). <sup>1</sup>H NMR (500 MHz, CDCl<sub>3</sub>): δ 8.13 (d, *J* = 8.7 Hz, 1H), 7.15-7.11 (m, 2H), 6.23 (dd, *J* = 17.0, 1.3 Hz, 1H), 6.10 (dd, *J* = 16.9, 10.2 Hz, 1H), 5.66 (dd, *J* = 10.2, 1.3 Hz, 1H), 3.54 – 3.45 (m, 4H), 1.89 – 1.81 (m, 2H). <sup>13</sup>C NMR (125 MHz, CDCl<sub>3</sub>): δ 166.93, 166.33, 146.52, 142.34, 135.78, 130.58, 127.16, 127.07, 120.13, 119.13, 36.51, 36.25, 29.41. HRMS *m/z* Calculated for C<sub>13</sub>H<sub>15</sub>N<sub>6</sub>O<sub>4</sub> [M+H]<sup>+</sup>: 319.1155. Found: 319.1154.

**Polymerization reactions.** The polymerization procedure was adapted from Hou *et al.*<sup>5</sup> In a typical experiment, 4-aminobenzyl-biotinylamide **4**<sup>6</sup> (17 mg, 46 μmol) was dissolved in degassed 1:1 H<sub>2</sub>O/THF (0.8 mL) and reacted with HBF<sub>4</sub> (8.7 μL of a 50 wt% aq. solution, 69 μmol) at 0 °C under an Ar atmosphere. The diazonium salt was generated by the addition of NaNO<sub>2</sub> (3.9 mg, 55 μmol) into the reaction mixture. After 30 min, a degassed mixture of disaccharide monomer **1** (75 mg, 170 μmol), nitrophenylazide monomer **3** (18 mg, 57 μmol), acrylamide (49 mg, 690 μmol), and NaOCN (15 mg, 220 μmol) in 1:1 H<sub>2</sub>O/THF (1.2 mL) was introduced to the diazonium salt, and the reaction mixture was heated to 60 °C for 16 h. The resulting mixture was dialyzed (3000 MWCO) at 4 °C against H<sub>2</sub>O for 48 h, purified by gel filtration chromatography (G-25), and lyophilized to afford the desired polymer as fluffy powder. No further purification was necessary following dialysis, as indicated by the absence of signal for vinyl protons in the purified polymer solutions.

The number of glycosyl units incorporated into the polymer (Table1, x) was calculated by comparing the integrals of the methyl peaks of fucose (1.24 ppm, 3H) and those of the phenyl group of the biotin handle (7.18 ppm, 4H). The number of nitrophenylazide crosslinker units (Table1, y) was calculated by comparing the integrals of the phenyl proton peaks (8.27 ppm, 3H) and those of the phenyl group of the biotin handle. The number of the 3-hydroxypropyl

units (Table1, z) was calculated by comparing the integrals of the methylene proton (3.63 ppm, 2H) and those of the phenyl group of the biotin handle.

**FucGal polymer (9).** Polymer **9** was prepared using the above procedure without nitrophenylazide monomer **3** to yield an orange fluffy powder (42%).  $M_n$  (SEC) = 26300. PDI (SEC) = 1.17.  $^1\text{H}$  NMR (500 MHz,  $\text{D}_2\text{O}$ ):  $\delta$  7.18 (d,  $J$  = 15.5 Hz, 5H), 5.24 (s, 11H), 5.11 – 5.01 (m, 5H), 4.55 – 4.26 (m, 32H), 4.13 – 3.51 (m, 186H), 3.48 – 3.12 (m, 38H), 2.43 – 2.04 (m, 229H), 1.91 – 1.44 (m, 500H), 1.30 – 1.15 (m, 58H).

**FucGal crosslinker polymer (10).** Polymer **10** was prepared using the above procedure to yield a light yellow fluffy powder (20% yield).  $M_n$  (SEC) = 23900. PDI (SEC) = 1.22.  $^1\text{H}$  NMR (500 MHz,  $\text{D}_2\text{O}$ ):  $\delta$  8.27 – 7.95 (m, 28H), 7.18 (d,  $J$  = 16.3 Hz, 6H), 5.24 (s, 25H), 5.12 – 4.99 (m, 18H), 4.55 – 4.25 (m, 58H), 4.12 – 3.49 (m, 374H), 3.42 – 3.12 (m, 80H), 2.44 – 2.00 (m, 159H), 1.89 – 1.46 (m, 338H), 1.24 – 1.14 (m, 91H).

**Control crosslinker polymer (11).** Polymer **11** was prepared using the above procedure, but substituting **1** with **2**, to yield a white fluffy powder (21% yield).  $M_n$  (SEC) = 23000. PDI (SEC) = 1.17.  $^1\text{H}$  NMR (500 MHz,  $\text{D}_2\text{O}$ ):  $\delta$  8.29 – 7.90 (m, 20H), 7.18 (d,  $J$  = 16.1 Hz, 5H), 3.63 (s, 85H), 3.24 (s, 98H), 2.46 – 1.94 (m, 213H), 1.70 (d,  $J$  = 54.2 Hz, 477H).

### 4-3. Biological Procedures

**Animals, Tissue Isolation and Synaptosome Preparation.** Sprague Dawley rats and C57BL/6 wild type, *FUT1*<sup>-/-</sup> and *FUT2*<sup>-/-</sup> mice were maintained in accordance with proper Institute of Animal Care and Use Committee (IACUC) procedures. Adult mice (3-4 months of age) and postnatal day 3 (P3) pups were anesthetized with CO<sub>2</sub> and dissected to remove the cortex and hippocampus. Synaptosomes (P2') were prepared from P3 rat pups by using a sucrose density gradient as previously described<sup>7</sup> and dissolved in lectin binding buffer (100 mM Tris pH 7.5, 150 mM NaCl, 1 mM CaCl<sub>2</sub>, 1 mM MgCl<sub>2</sub>, 0.5% NP-40, and 0.2% sodium deoxycholate supplemented with EDTA-free Complete protease inhibitors (Roche)). To prepare cortical membrane fractions, cortices from P3 rat pups were extracted and fractionated using the Qproteome Cell Compartment Kit (Qiagen) to give a final protein concentration of 5 mg/mL.

**UEAI Lectin Enrichment and Photocrosslinking Capture.** Fluorescein-conjugated UEAI (Vector Laboratories; 100 µg) was incubated with polymer **10** or **11** (50 µM) in lectin binding buffer with gentle end-over-end mixing at 37 °C for 3 h in the dark. The samples were irradiated with UV light at 365 nm (Blak-Ray B100 AP, Upland) for 15 min at 4 °C if indicated and mixed further at rt for 45 min in the dark. The samples were diluted with binding buffer to a final concentration of 1 mg/mL and incubated with pre-treated (blocked with 0.1% fish gelatin) streptavidin agarose resin (Pierce) at 4 °C for 2 h. The resin was washed twice with 10 column volumes each of low salt buffer (0.1 M Na<sub>2</sub>HPO<sub>4</sub> pH 7.5, 0.15 M NaCl, 1% Triton X-100, 0.5% sodium deoxycholate, 0.1% SDS), twice with 10 column volumes each of high salt buffer (0.1 M Na<sub>2</sub>HPO<sub>4</sub> pH 7.5, 0.5 M NaCl, 0.2% Triton X-100), and once with 10 column volumes of 50 mM Tris•HCl pH 7.4. Captured protein was eluted in boiling sample buffer (50 mM Tris pH 6.8, 2.5% SDS, 2 mM DTT, 10% glycerol, 2 mM biotin) for 5 min. The sample was resolved on a NuPAGE

4-12% Bis-Tris gel (Invitrogen), transferred to polyvinylidene difluoride (PVDF) membrane (Millipore) and visualized using a Typhoon Scanner (GE Healthcare).

**Fuc $\alpha$ (1-2)Gal Glycan-Binding Protein Enrichment and Photocrosslinking Capture.** Brain lysates from the synaptosomal and membrane fractions (1.2 mg) were pre-incubated with polymer **11** (35  $\mu$ M) in lectin binding buffer and pre-cleared against high capacity streptavidin agarose resin (Pierce) with gentle end-over-end mixing for 2 h in the dark. After centrifugation at 1000 x *g* for 3 min, the supernatants were incubated with polymer **10** or **11** (75  $\mu$ M) in lectin binding buffer with gentle end-over-end mixing at 37 °C for 3 h in the dark. The samples were irradiated with UV light at 365 nm for 15 min at 4 °C and mixed further at rt for 45 min in the dark. The samples were diluted with binding buffer to a final concentration of 1 mg/mL and incubated with pre-treated (blocked with 0.1% fish gelatin) high capacity streptavidin agarose resin at 4 °C for 4 h. The resin was then washed twice with 10 column volumes each of low salt buffer, twice with 10 column volumes each of high salt buffer, once with 20 column volumes of 4 M urea + 1% SDS and once with 10 column volumes of 50 mM Tris•HCl pH 7.4. Captured protein was eluted in boiling sample buffer for 5 min and subsequently resolved by 10% SDS-PAGE for LC-MS analysis.

**Silver Staining, In-Gel Digestion, and LC-MS Analysis.** All silver staining reagents were prepared fresh before they were used. The staining and destaining, in-gel tryptic digests, and peptide extractions were performed as described previously.<sup>8</sup> NanoLC-MS of in-gel tryptic digests was performed on a Thermo Fisher LTQ XL linear ion trap mass spectrometer using a modified vented column setup and data-dependent scanning.<sup>9</sup> Samples were loaded onto a 360  $\mu$ m x 100  $\mu$ m precolumn (2 cm, 5  $\mu$ m Monitor C18) and desalted before the precolumn was placed in-line with the analytical column. Peptides were then eluted with a linear gradient from 0 to 40% B over 30 min (A, 0.1 M aq. HOAc; B, 0.1 M HOAc in CH<sub>3</sub>CN), with a flow rate of



approximately 250 nL/min, and using a 360  $\mu\text{m}$  x 75  $\mu\text{m}$  self-packed column with an integrated electrospray emitter (10 cm, 5  $\mu\text{m}$  Monitor C18). For data-dependent experiments, the mass spectrometer was programmed to record a full-scan ESI mass spectrum ( $m/z$  400-2000), followed by five data-dependent MS/MS scans in the ion trap (relative collision energy of 35%, 3.5 Da isolation window). Dynamic exclusion parameters were set as follows: repeat count=1, repeat duration=15 s, and exclusion duration=30 s.

MS/MS spectra were searched against a rat subset of the European Bioinformatics Institute-International Protein Index (EBI-IPI) database (downloaded August 1, 2007), with an appended reversed database using Sequest 3.0. A fixed modification of Cys (+57), a variable modification of Met (+16), and trypsin cleavage were specified. Mass tolerances of 3.0 Da for the parent and 0.8 Da for the fragment ions were employed. Search results were compiled and filtered in Scaffold 2.0 (Proteome Software, Inc., Portland, OR). Peptide identifications were accepted if they could be established at  $\geq 95.0\%$  probability, as specified by the Peptide Prophet algorithm.<sup>10</sup> Protein identifications were accepted if they could be established at  $\geq 99.0\%$  probability (as specified by the Protein Prophet algorithm)<sup>11</sup> and were based on at least three unique peptide identifications. To be listed in Table 1, proteins had to be identified as specified both in at least two of the three synaptosome and/or membrane fractions from the polymer **10** samples, as well as on the basis of six unique peptides identified from among the various fractions. By contrast, proteins were eliminated as non-specific if even a single peptide was also identified in any of the polymer **11** samples. Using these highly stringent filtering criteria, 44 candidate GBPs were identified from six independent runs (three synaptosome and membrane fractions).

**Protein Expression and Purification.** DCLK1 (DCAMKL1) was expressed and purified from *E. coli* BL21(DE3) cells harboring the recombinant plasmid vector pET28a-DCLK1-His as previously described.<sup>12</sup> SV2a was expressed and purified from HEK293 cells transfected with

plasmid vector SV2a-FLAG-pIRES2 as previously described.<sup>13</sup> G $\alpha$ O protein was kindly provided by Dr. Tohru Kozasa (University of Illinois, Chicago). PKC $\epsilon$  protein was purchased from ProspecBio.

**Binding Validation of Lectin Candidates to Fuc $\alpha$ (1-2)Gal by ELLA.** Nunc Maxisorp 384-well plates were coated overnight at 4 °C with lectin (50 ng/well) in carbonate buffer (50  $\mu$ L, 50 mM, pH 9.0). The wells were then washed with washing buffer (3 x 100  $\mu$ L, 50 mM Tris-HCl pH 7.4, 150 mM NaCl containing 0.03% Tween 20). The washing procedure was repeated after each incubation throughout the assay. After washing, the wells were filled with serial dilutions of biotinylated polymers (Fuc $\alpha$ (1-2)Gal, Gal $\alpha$ (1-2)Gal and control (-OH) polymer, 25  $\mu$ L/well, GlycoTech) in binding buffer (PBS, 1 mM CaCl<sub>2</sub>, 4 mM MgCl<sub>2</sub>) and incubated at rt for 2.5 h. The wells were washed and blocked with 10% Fetal Bovine Serum (FBS; 80  $\mu$ L) at 37 °C for 1 h. The plates were then incubated with horseradish peroxidase-conjugated streptavidin (Pierce; 1:40000) at rt for 1 h, developed with 3,3',5,5-tetramethylbenzidine substrate (TMB; Pierce) and quenched with 2 M H<sub>2</sub>SO<sub>4</sub>. Absorbances were measured at 450 nm using a PerkinElmer Victor plate reader and were fitted to a linear regression analysis using KaleidaGraph (version 4.1.2). Experiments were performed in triplicate, and data represent the mean  $\pm$  SEM.

**Chemoenzymatic Labeling of Cell Lysates.** This procedure was adapted from Chaubard *et al.*<sup>14</sup> The cortices of adult C57BL/6, *FUT1*<sup>-/-</sup> and *FUT2*<sup>-/-</sup> mice were dissected on ice and lysed in boiling 1% SDS (5 volumes/weight) with sonication until the mixture was homogeneous. Protein was precipitated with methanol/chloroform/water. Briefly, protein was diluted to 200  $\mu$ L and precipitated by sequential mixing with 600  $\mu$ L of MeOH, 200  $\mu$ L of CHCl<sub>3</sub> and 450  $\mu$ L H<sub>2</sub>O, after which the mixture was centrifuged at 23,000 x *g* for 15 min. Precipitated protein was washed with 450  $\mu$ L of MeOH and centrifuged at 23,000 x *g* for 10 min. After the protein pellet was allowed to dry briefly, the pellet was re-dissolved at 5 mg/mL in 20 mM HEPES pH 7.9

containing 1% SDS, and diluted 5-fold into a buffer with the following final concentrations: 20 mM HEPES pH 7.9, 50 mM NaCl, 2% NP-40, 5 mM MnCl<sub>2</sub>. UDP-GalNAz (Invitrogen; 25 μM) and BgtA (0.16 mg/mL) were added, and the samples were incubated at 4 °C for 16-20 h. The labeled proteins were precipitated as above and resuspended in 50 mM Tris pH 7.4 containing 1% SDS at 4 mg/mL. The resuspended proteins were subsequently reacted with 5-carboxytetramethylrhodamine (TAMRA) alkyne (Invitrogen) per the Click-It™ TAMRA Protein Analysis Detection kit instructions (Invitrogen), except that EDTA-free Complete™ protease inhibitors were added during the reaction. Negative controls were performed under identical conditions except that BgtA was omitted from the labeling reaction. After the labeling reactions, protein was precipitated using methanol/chloroform/water as described above and re-dissolved in boiling 2% SDS. TAMRA-labeled proteins were resolved on a NuPAGE 4-12% Bis-Tris gel and transferred to PVDF membrane. The membrane was blocked with 5% milk (Biorad) in TBST (50 mM Tris-HCl pH 7.4, 150 mM NaCl, 0.05% Tween 20) for 1 h at rt and immunoblotted with a rabbit anti-TAMRA antibody (Invitrogen; 1:1000) and a mouse anti-tubulin antibody (Sigma Aldrich 1:5000). Membranes were washed with TBST, incubated with the appropriate Alexa Fluor 680-conjugated (Invitrogen) or IR800-conjugated (Rockland) secondary antibody, and visualized using a LiCOR Odyssey Imaging System.

**Detection of Fuc $\alpha$ (1-2)Gal Glycoproteins by UEA1 Lectin Blotting.** Cortical proteins precipitated from C57BL/6, *FUT1*<sup>-/-</sup> and *FUT2*<sup>-/-</sup> mice were resolved on a NuPAGE 4-12% Bis-Tris gel and transferred to PVDF membrane. The membrane was blocked with 5% milk (Biorad) in PBST (PBS+ 0.05% Tween 20) at rt for 1 h and immunoblotted with fluorescein-conjugated UEA1 (1:100) at rt for 1 h. The membrane was washed with TBST and visualized using a Typhoon Scanner.

**Neuronal Cultures for Functional Assays.** For biochemical assays, cortical neuronal cultures were prepared as previously described,<sup>15</sup> except that neurons from E15-16 timed-pregnant C57BL/6, *FUT1*<sup>-/-</sup> or *FUT2*<sup>-/-</sup> mice were plated onto poly-DL-lysine-coated 6-well plates (BD Bioscience). Neurons were maintained for up to 10 days in vitro (DIV) in Neurobasal medium (NBM; Life Technologies) supplemented with 2 mM Glutamax-I and 2% B-27 (Invitrogen). For staining and imaging, hippocampal neurons were prepared as previously described,<sup>16</sup> except that neurons from E15-16 timed-pregnant mice were plated on poly-DL-lysine-coated glass coverslips (Carolina Biological) at a density of 75 cells/mm<sup>2</sup>. Neurons were maintained for up to 10 DIV in NBM supplemented with 2 mM Glutamax-I and 2% B-27.

**Assaying SV2a Distribution in Cortical Neurons.** Cortical neuron cultures (C57BL/6 *FUT1*<sup>-/-</sup> and *FUT2*<sup>-/-</sup>, 10 DIV) were washed once with ice-cold PBS, gently scraped with trypsin and suspended in Dulbecco's Modified Eagle Medium (DMEM; Life Technologies) supplemented with 10% FBS (Invitrogen) and then centrifuged for 10 min at 500 x g at 4 °C. Pellets were washed with cold PBS and fractionated using the Qproteome Cell Compartment Kit. The protein concentrations of the resulting membrane extracts were measured using the BCA assay (Pierce). Equal amounts of protein were resolved on a NuPAGE 4-12% Bis-Tris gel and transferred to PVDF membrane. The membrane was blocked with 5% milk, immunoblotted with a goat anti-SV2a (E-15, Santa Cruz; 1:200) or mouse anti-synaptophysin (Sigma Aldrich; 1:800) antibody and visualized using a LiCOR Odyssey Imaging System. SV2a distribution in the membranes of *FUT1*<sup>-/-</sup> and *FUT2*<sup>-/-</sup> neurons was expressed relative to the level in C57BL/6 mice (n = 3-5) and was reported as the mean ± SEM. Statistical analysis was performed using the Student's unpaired t-test to compare the SV2a level between *FUT2*<sup>-/-</sup> and C57BL/6 neurons.

**Immunostaining and Quantification.** Hippocampal neurons on coverslips were rinsed once with PBS, fixed with 4% paraformaldehyde (PFA)/ 4% sucrose at rt for 20 min, washed twice

with PBS, permeabilized with 0.3% TritonX-100 at rt for 5 min, and washed twice with PBST. Non-specific binding was blocked by incubating with 5% goat serum (GS) in PBST at 4 °C for 1 h. After rinsing twice with PBST, the cells were incubated with a rabbit anti-SV2a antibody (Synaptic Systems; 1:300) in 5% GS at rt for 2 h. Excess antibody was removed by washing five times with PBST, and the cells were incubated overnight with a mouse anti-synaptophysin antibody (Millipore; 1:300) in 5% GS at 4 °C. After washing five times with PBST, the cells were treated with anti-rabbit IgG AlexaFluor 488 (Invitrogen; 1:1000) and anti-mouse IgG AlexaFluor568 (Invitrogen; 1:1000) antibodies in 5% GS at rt for 2 h. The coverslips were mounted onto glass slides and imaged using a LSM510 Meta confocal laser scanning microscope with a 100X 1.40 N.A oil immersion plan apochromat objective lens (Carl Zeiss MicroImaging, Inc.). All images were acquired blind to the experimental conditions. To minimize possible sources of bias, 7-10 neurons were randomly selected from 3 representative fields in each cover slip. Each genotype was analyzed from at least three independent experiment using three different mice (n=70-80 images).

Images were analyzed blind to the experimental condition using NIH ImageJ software (<http://rsbweb.nih.gov/ij/>) using the JACoP Colocalization plugin, and colocalized puncta analysis was performed as previously described<sup>17</sup> using the Colocalization Highlighter plugin. To determine the degree of colocalization between two proteins, each channel was set with the same threshold value, and the distinct puncta in each channel were overlaid to generate a colocalized region. Colocalized puncta (i.e. yellow pixel clusters) were defined as continuous pixel clusters between 0.5 – 11 µm in size and having an intensity at least 2-fold greater than each individual (red or green) channel in the adjacent dendrite. The number of colocalized puncta per unit area (puncta density) were manually counted and then normalized with respect to the WT sample. Statistical analyses were performed using the Student's unpaired t-test, and the data were reported as the mean ± SEM.

**Surface Biotinylation and SV2a Immunoprecipitation.** Cortical neuronal cultures (C56BL/7, *FUT1*<sup>-/-</sup> and *FUT2*<sup>-/-</sup>, 10 DIV) were washed once with ice-cold PBS, pH 8.0, and biotinylated by incubating with 0.5 mg/ml EZ-Link Sulfo-NHS-LC-LC-Biotin (Pierce) for 25 min at 4 °C with gentle shaking.<sup>18</sup> Cultures were washed with PBS, pH 7.4, and incubated with 100 mM glycine for 15 min at 4 °C to quench the reaction. Neurons were rinsed with ice-cold PBS, pH 7.4, and extracted in solubilization buffer (150 mM NaCl, 50 mM Tris-HCl, 1 mM EDTA, 1% NP-40 and protease inhibitor) for 1 h at 4 °C. Insoluble material was removed by ultracentrifugation (19,000 x g for 20 min), and the supernatants were subjected to immunoprecipitation by incubating with an anti-SV2a antibody (E-15, Santa Cruz) overnight at 4 °C. The samples were diluted with solubilization buffer to a final concentration of 1 mg/mL and then were incubated with pre-treated (blocked with 0.1% fish gelatin) protein A/G sepharose beads (ThermoFisher) at 4 °C for 2 h. The resin was washed three times with 10 column volumes of solubilization buffer, and the captured protein was eluted with loading dye without boiling. Equal amount of protein were resolved on a NuPAGE 4-12% Bis-Tris gel and transferred to PVDF membrane. The membrane was blocked in 5% milk and immunoblotted with a rabbit anti-SV2a antibody (1:300, Synaptic Systems) for total immunoprecipitated SV2a and streptavidin-HRP (1:1000, Pierce) for biotinylated SV2a. Labeled bands were visualized and quantified using a LiCOR Odyssey Imaging System. The proportion of SV2a on the plasma membrane of *FUT2*<sup>-/-</sup> neurons was expressed as the normalized intensity of biotinylated-SV2a signal to the total SV2a, and was reported relative to the control C57BL/6 level (n=4) as the mean ± SEM. Statistical analysis was performed using the Student's unpaired t-test to compare the SV2a level between *FUT2*<sup>-/-</sup> and C57BL/6 neurons.

#### 4-4. Representative $^1\text{H}$ and $^{13}\text{C}$ NMR Spectra

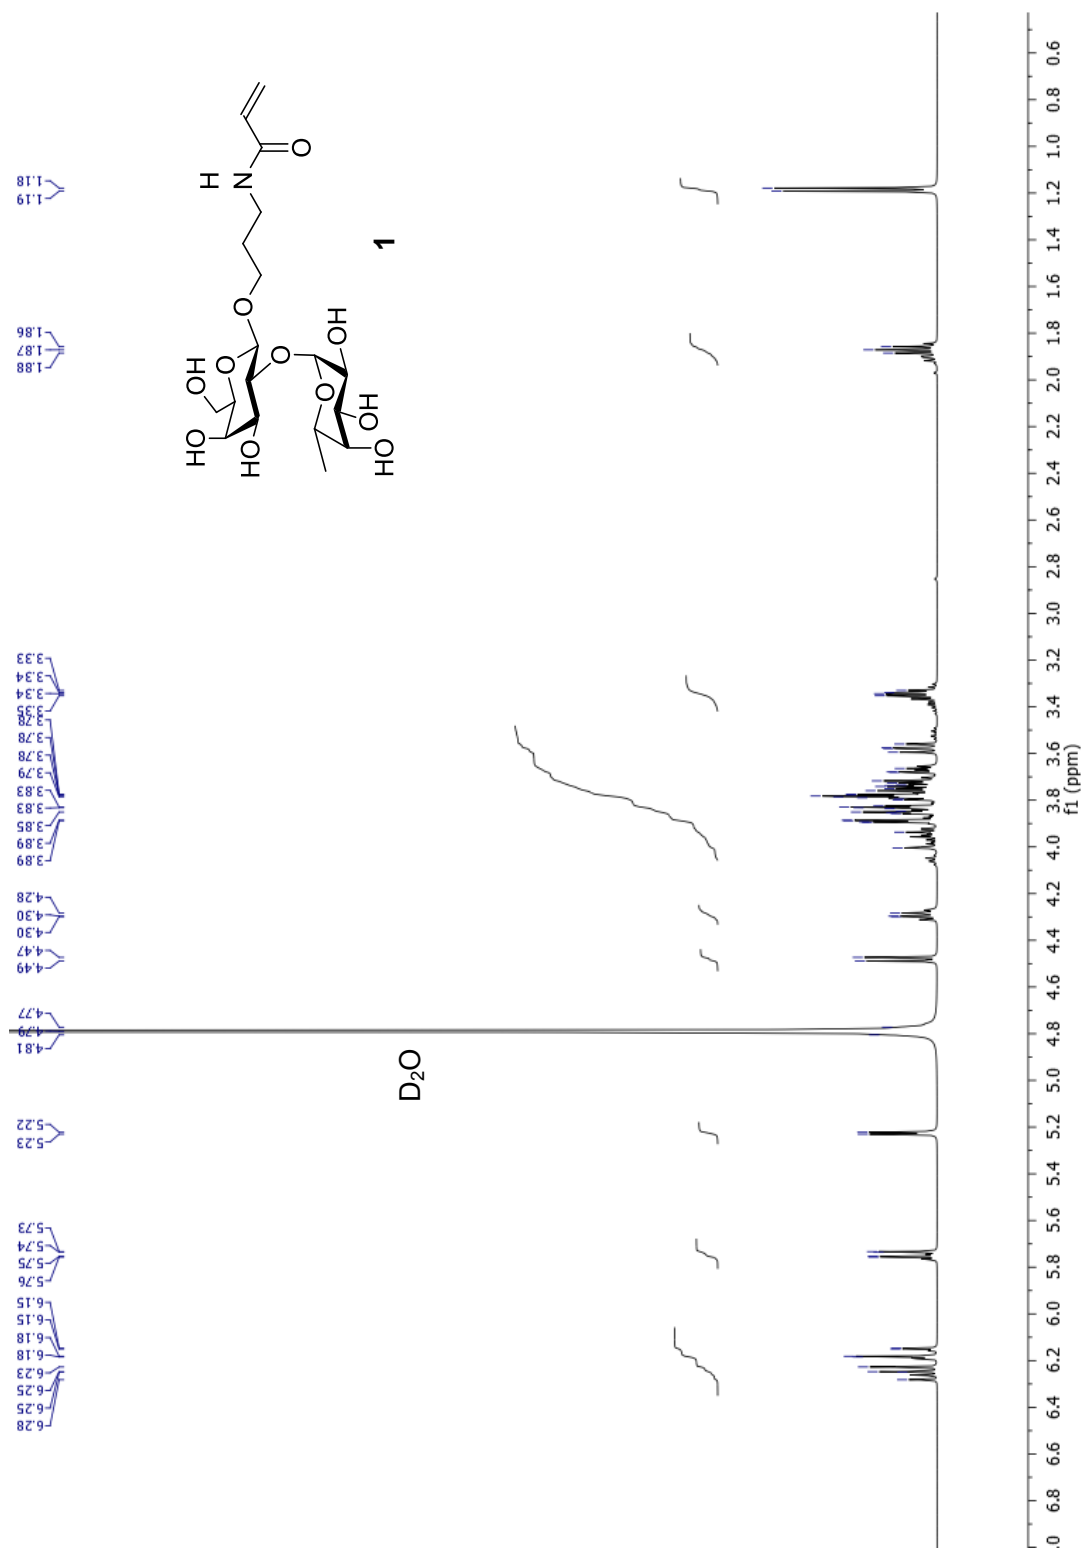

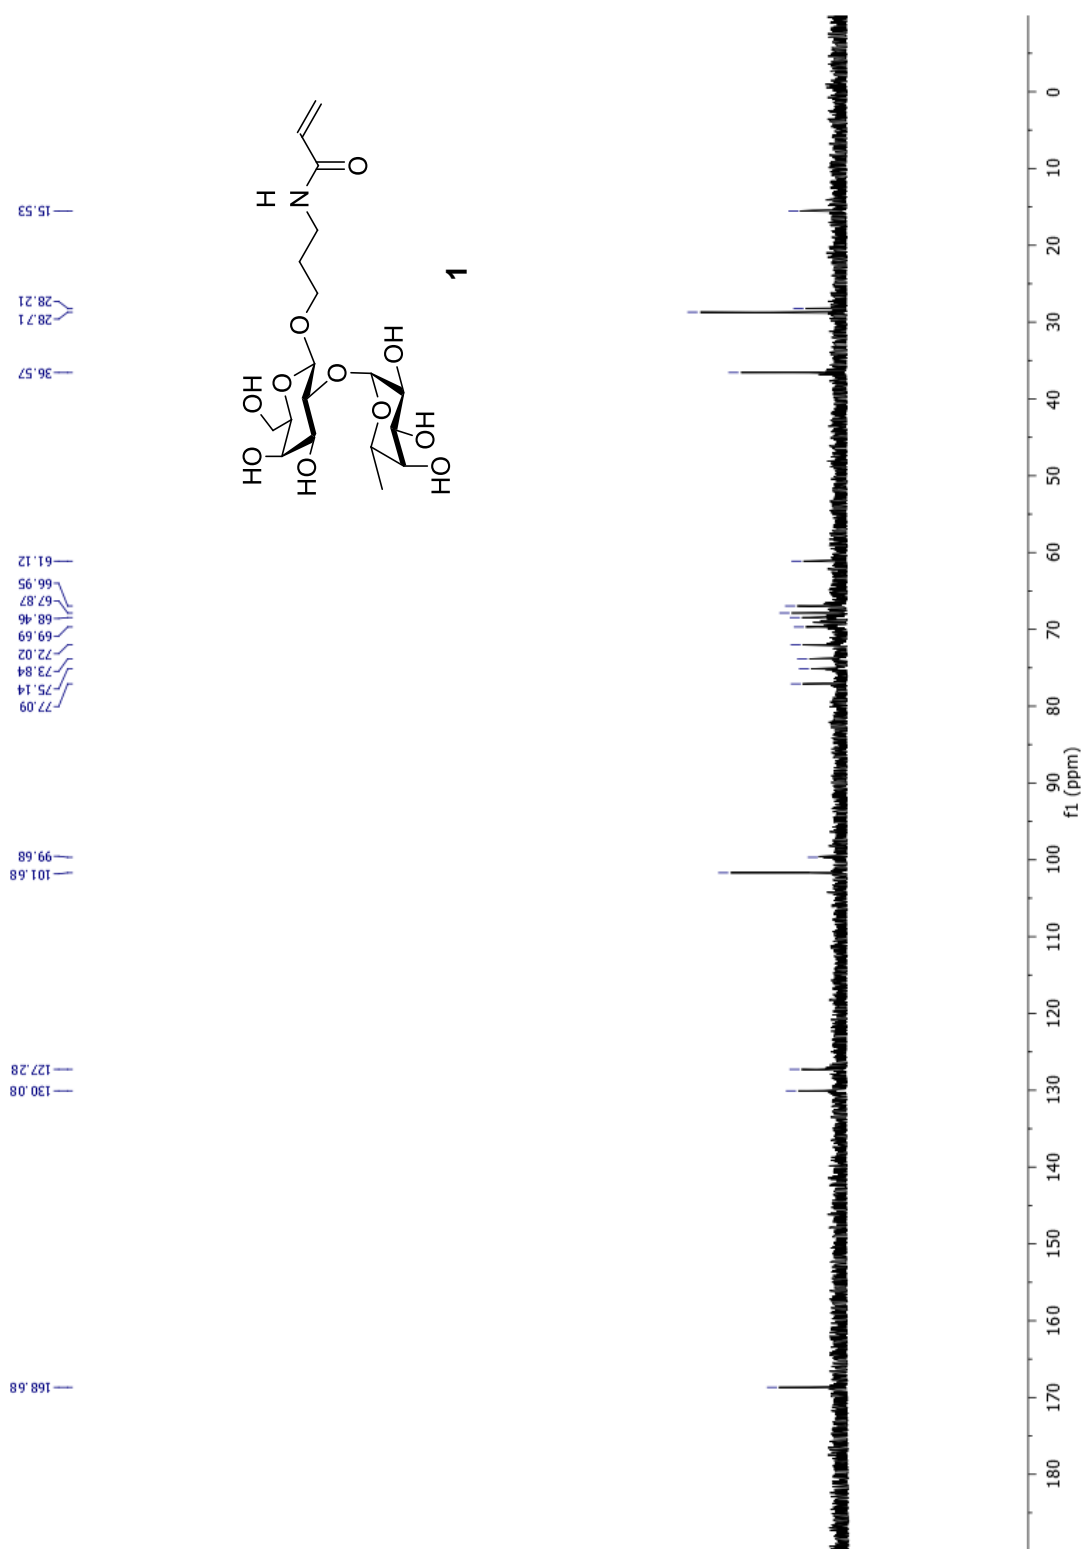



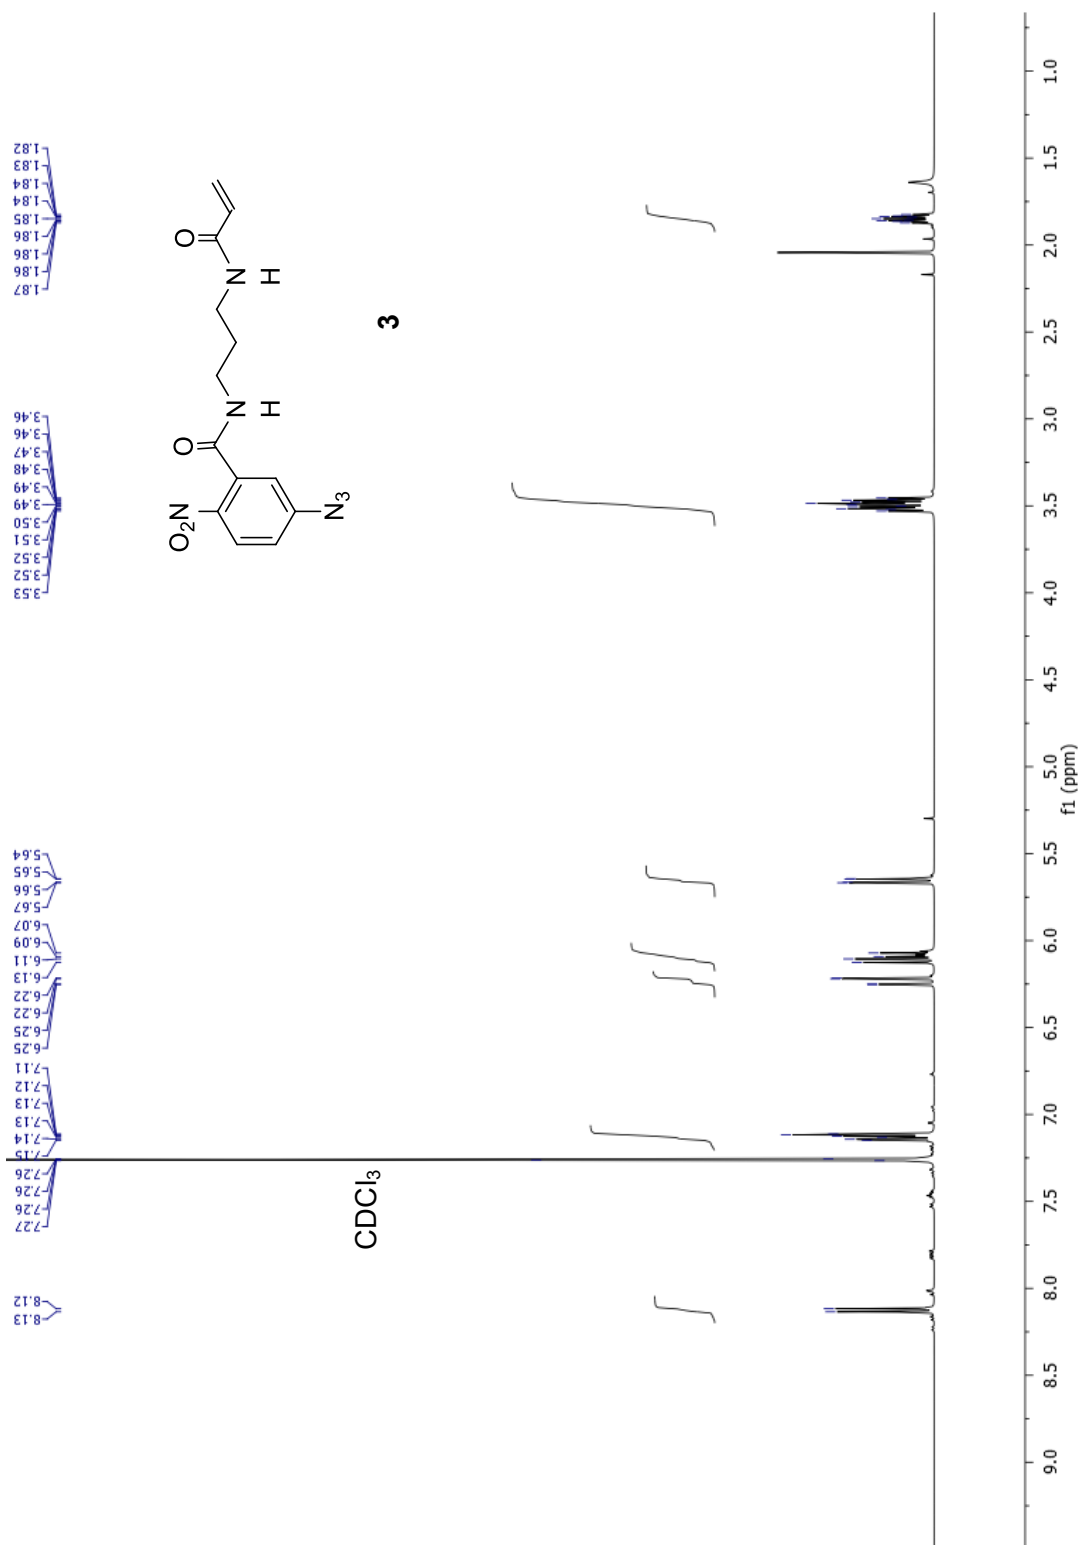

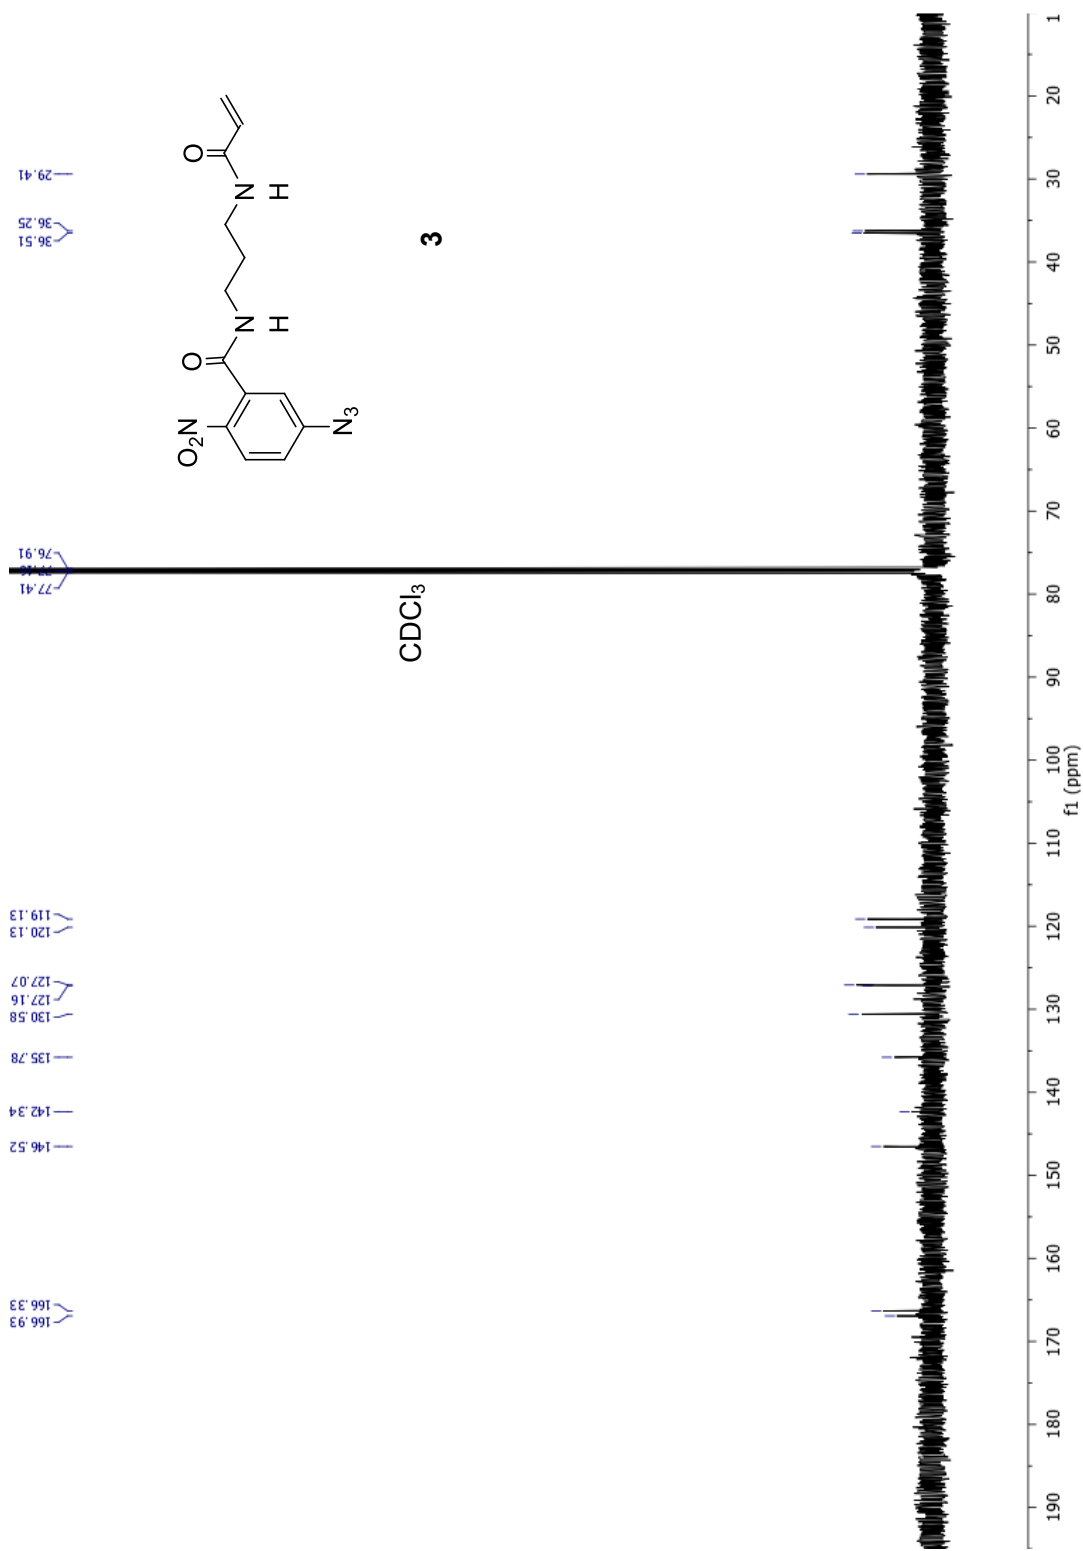

<sup>1</sup>H NMR Polymer 9

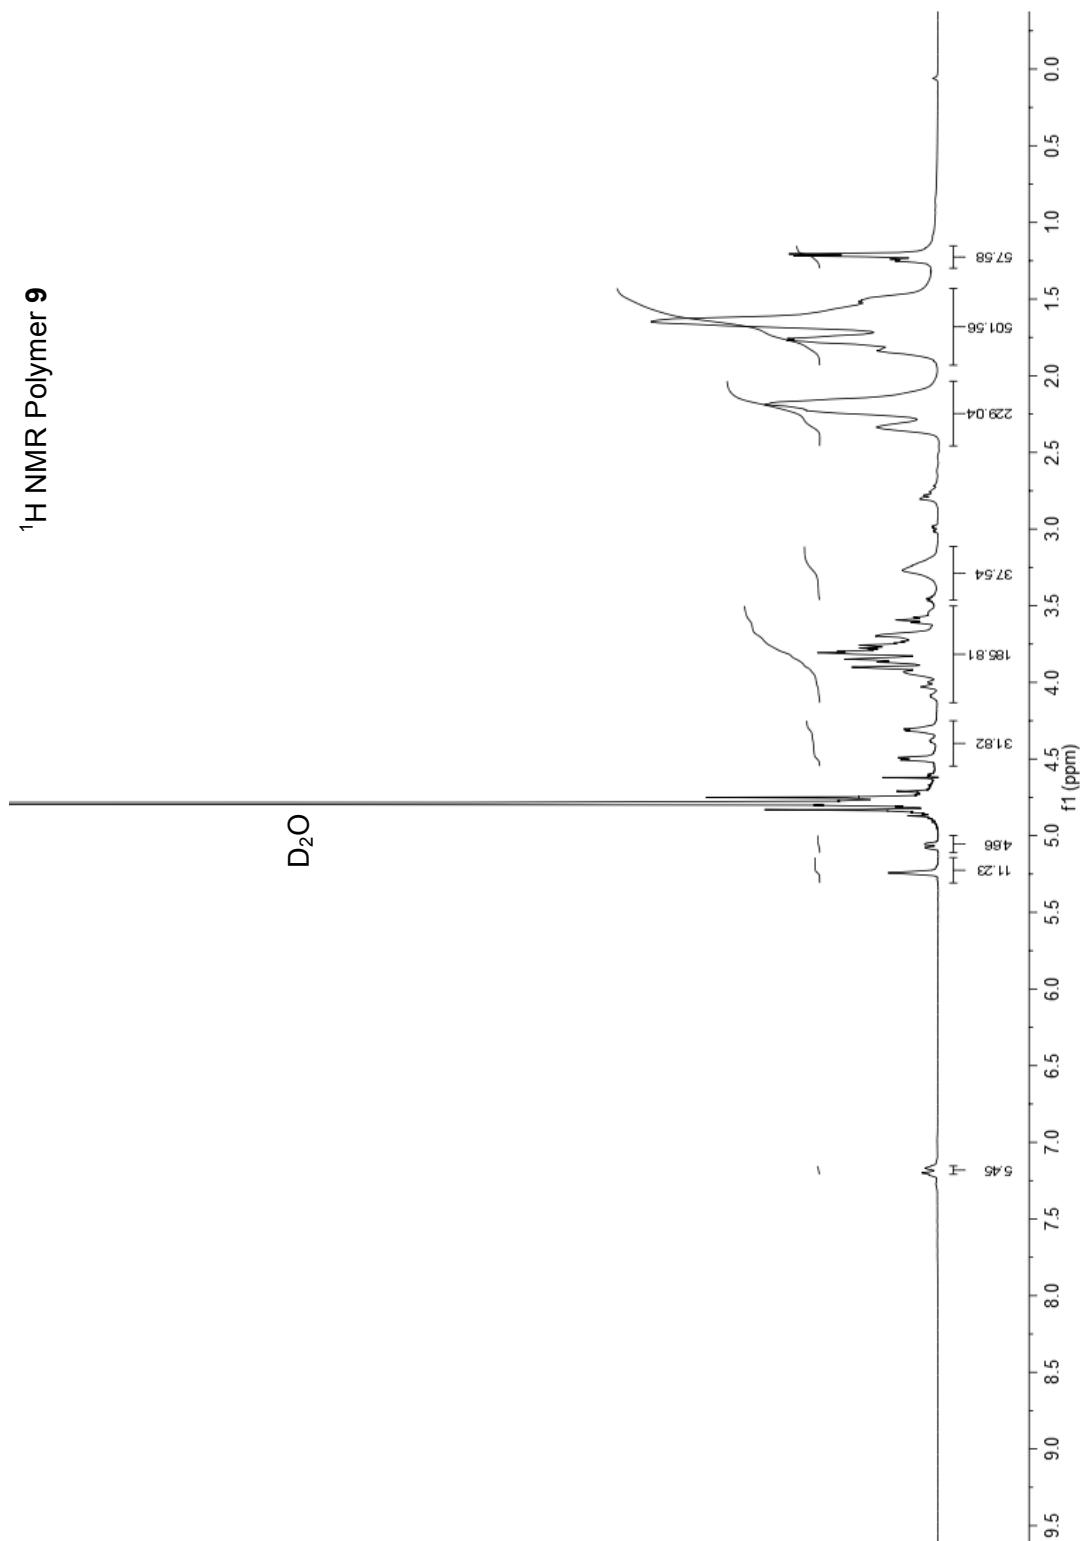

<sup>1</sup>H NMR Polymer 10

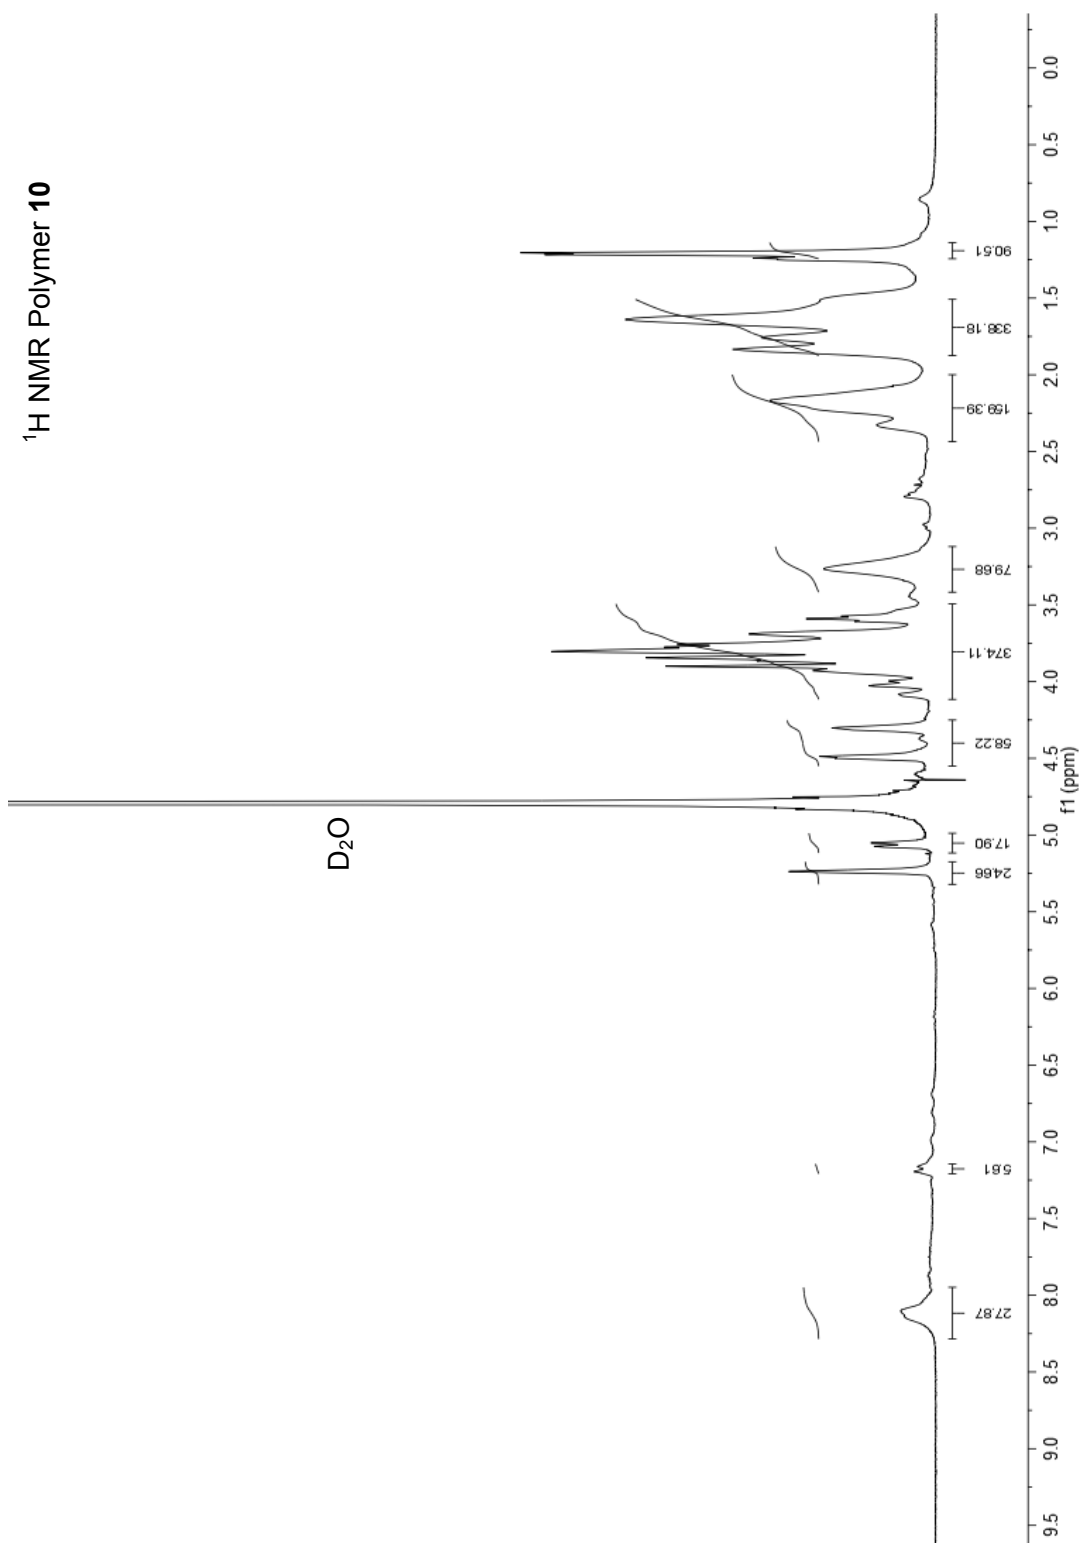

<sup>1</sup>H NMR Polymer 11

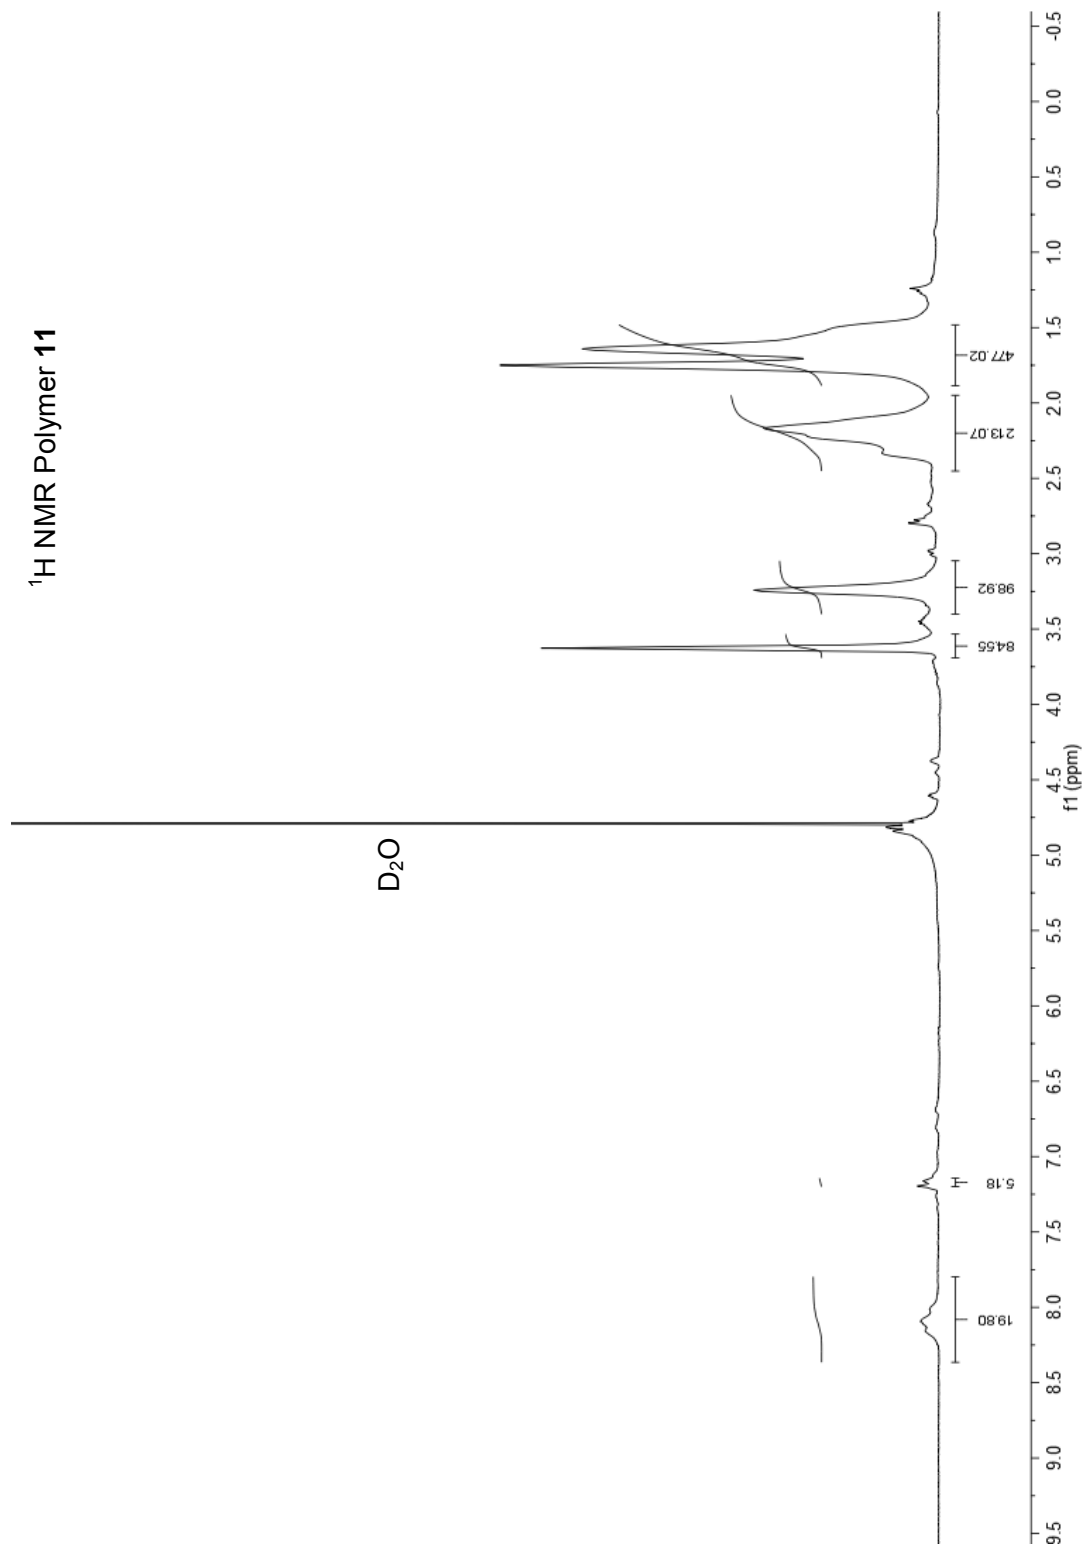

## 5. References

1. Wegman, B.; Schmidt, R. R. *Carbohydr. Res.* **1988**, 184, 254.
2. Damager, I.; Olsen, C.E.; Moller, B.L.; Motawia, M.S. *Synthesis.* **2002**, 3, 418.
3. Kanie, O.; Ito, Y.; Ogawa, T. *Tet. Lett.* **1996**, 37, 4551.
4. (a) Lindsley, C.W.; Zhao, Z.; Newton, R.C.; Leister, W.H.; Strauss, K.A. *Tet. Lett.* **2002**, 43, 4467. (b) Hemming, K.; Bevan, M.J.; Loukou, C.; Patel, S.D.; Renaudeau, D. *Synlett.* **2000**, 11, 1565.
5. Hou, S.; Sun, X-L.; Dong, C-M.; Chaikof, E.L. *Bioconjugate. Chem.* **2004**, 15, 954.
6. Tseng, P-Y.; Rele, S.M.; Sun, X-L. Chaikof, E.L. *Biomaterials.* **2006**, 27, 2627.
7. Huttner, W. B.; Schiebler, W.; Greengard, P.; De Camilli, P. *J. Cell Biol.* **1983**, 96, 1374.
8. Clark, P.M.; Dweck, J.F.; Mason, D.E.; Hart, C.R.; Buck, S.B.; Peters, E.C.; Agnew, B.J.; Hsieh-Wilson, L.C. *J. Am. Chem. Soc.* **2008**, 130, 11576.
9. Murrey, H.E.; Ficarro, S.B.; Krishnamurthy, C.; Domino, S.E.; Peters, E.C.; Hsieh-Wilson, L.C. *Biochemistry.* **2009**, 48, 7261.
10. Keller, A.; Nesvizhskii, A.I.; Kolker, E.; Aebersold, R. *Anal. Chem.* **2002**, 75, 5383.
11. Nesvizhskii, A.I.; Keller, A.; Kolker, E.; Aebersold, R. *Anal. Chem.* **2003**, 75, 4646.
12. Lin, P.T.; Gleeson, J.G.; Corbo, J.C.; Flanagan, L.; Walsh, C.A. *J. Neurosci.* **2000**, 20, 9152.
13. Yao, J.; Bajjalieh, S.M. *J. Biol. Chem.* **2008**, 283, 20628.
14. Chaubard, J.-L.; Khrisnamurthy, C.; Yi, W.; Smith, D.; Hsieh-Wilson, L.C. *J. Am. Chem. Soc.* **2012**, 134, 4489
15. Rexach, J.E.; Rogers, C.J.; Yu, S-H.; Tao, J.; Sun, Y.E.; Hsieh-Wilson, L.C. *Nat. Chem. Biol.* **2010**, 6, 645.
16. Rawat, M.; Gama, C.I.; Matson, J.B.; Hsieh-Wilson, L.C. *J. Am. Chem. Soc.* **2008**, 130, 2959.

17. (a) Kayser, M.S.; McClelland, A.C.; Hughes, E.G.; Dalva, M.B. *J. Neurosci.* **2006**, 26, 12152. (b) Jones, K.A.; Srivastava, D.P.; Allen, J.A.; Strachan, R.T.; Roth, B.L.; Penzes, P. *Proc. Natl. Acad. Sci.* **2009**, 106, 19575.
18. Yao, J.; Nowack, A.; Gardner, R. G.; Kensel-Hammes, P.; Bajjalieh, S. M. *J. Neurosci.* **2010**, 30, 5569.
